# Supplementary material for: 3D ordered macroporous germanium fabricated by electrodeposition from an ionic liquid and its lithium storage properties
Source: Royal Society of Chemistry journal article supplement (doi:10.1039/c3ta12923c), 2013-01-01
Supplement: c3ta12923c.pdf [file c3ta12923c.pdf]

## Supplementary Information

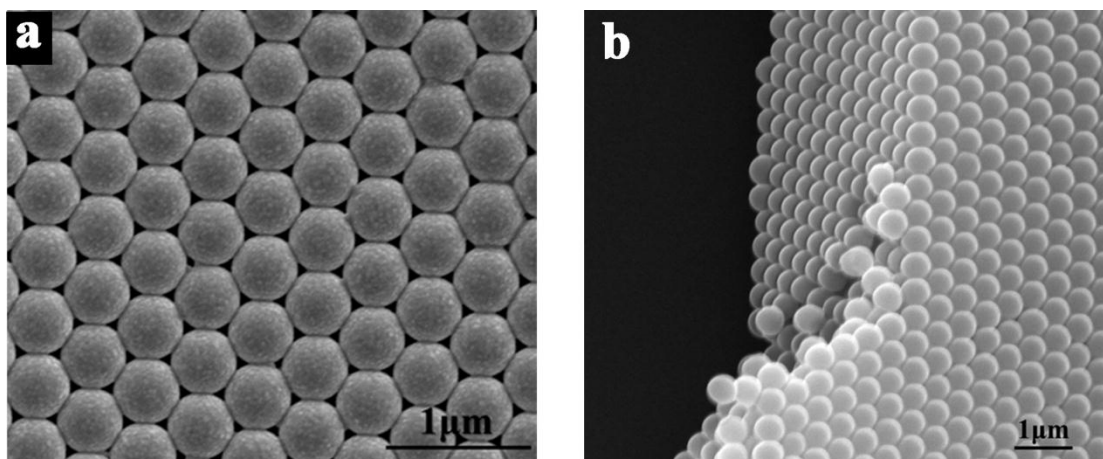

Fig S1 a top-down SEM image of PS template. b. cross-sectional SEM of PS template (with diameter of 440 nm).

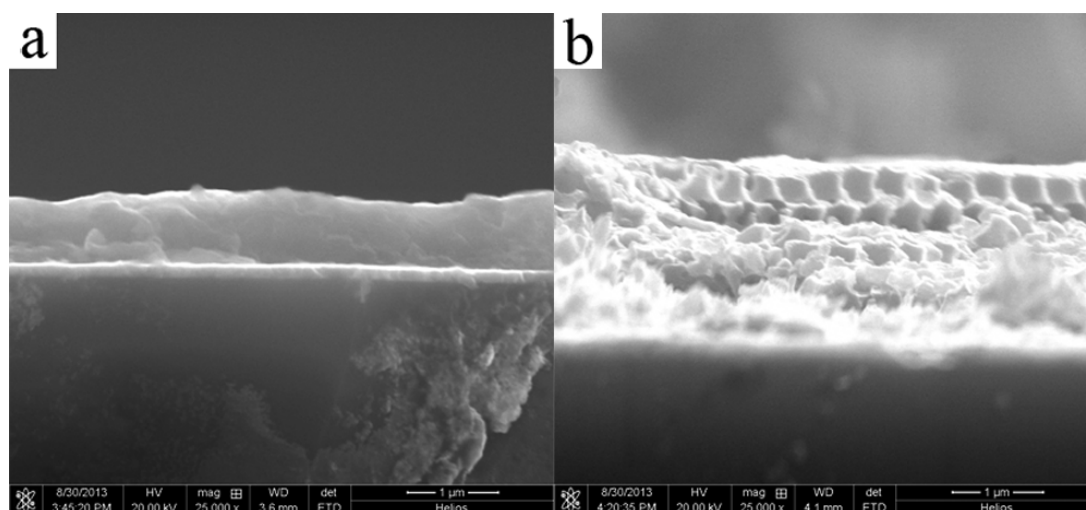

Fig. S2 The cross-sectional SEM of the dense Ge film(a) and 3DOM Ge film (b).

In order to show the thickness of the films, the cross-sectional SEM images of the Ge and 3DOM Ge films are added in Fig. S2. The thickness is about 1 μm for dense Ge film and 2 μm for 3DOM Ge, respectively. The mass of the electrodes is about 0.7 mg. The electrodes are disks with diameter of 14 mm, and the mass load is about 0.455 mg/cm<sup>2</sup>.

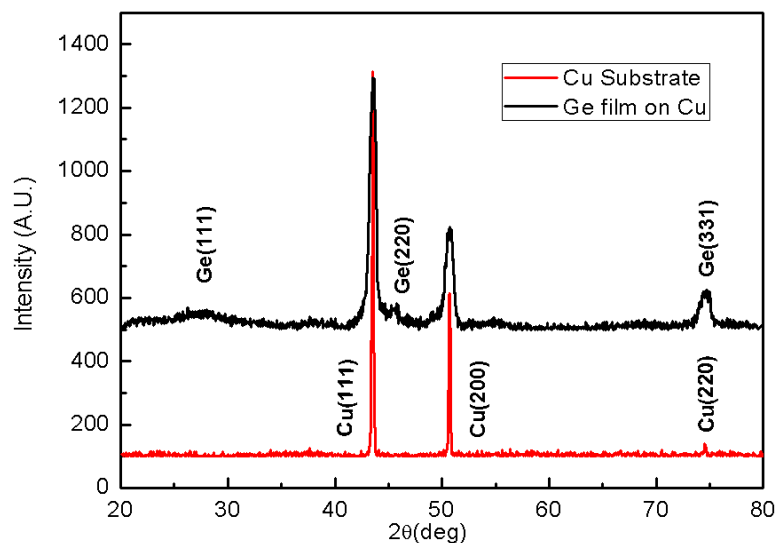

Fig. S3 Grazing incident XRD of Ge film on Cu substrate by ionic liquid electrodeposition  
XRD analysis of the films was done by grazing incidence XRD (GIXRD) model using monochromatic Cu K $\alpha$  radiation with a D8 Bruker diffractometer. X-ray scan is with an increment of 0.01° with time per step and the incident angle is 0.5°. Fig. S3 shows the XRD pattern of Ge film on Cu substrate. The diffraction peaks are corresponding to (111), (220) and (331) planes of the diamond structure of Ge (JCPDS number 04-0545). A broad 2 $\theta$  peak at ~20-30° is attributed to the amorphous germanium. Ge(220) shows characteristic of nanocrystalline germanium. And Ge (331) plane is overlapping with Cu (220), and shows a broad peak.

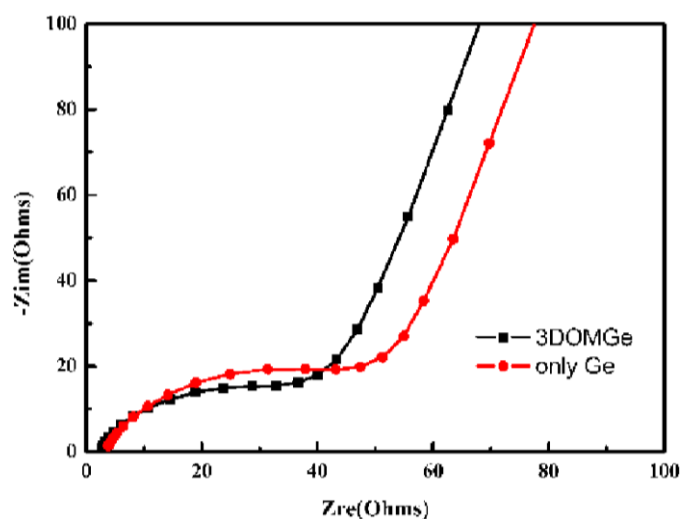

Fig. S4 Nyquist plots of the only Ge electrode and 3DOM Ge electrode (all of them are coated with carbon to enhance the conductivity).

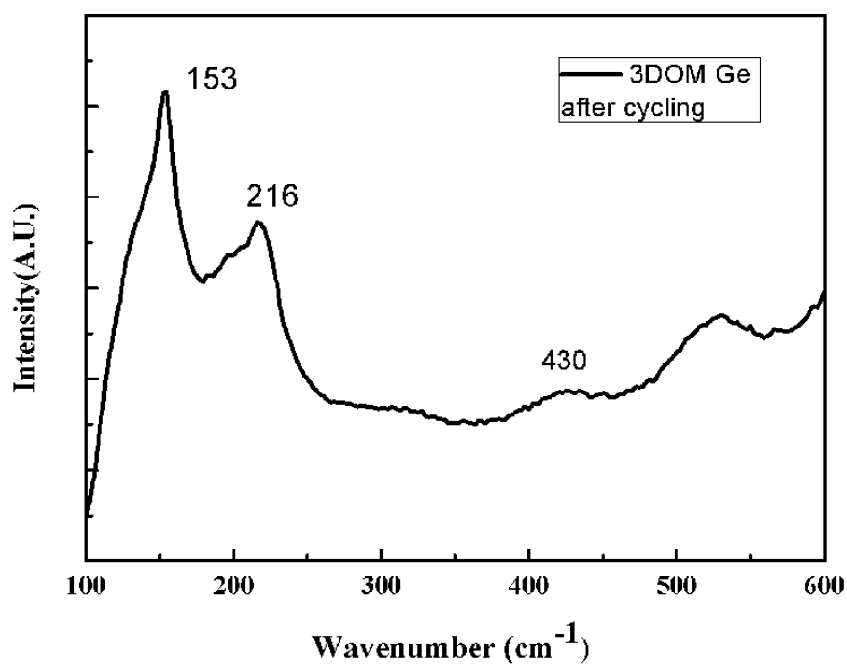

Fig. S5 Raman spectra of 3DOM Ge after 50 cycling.

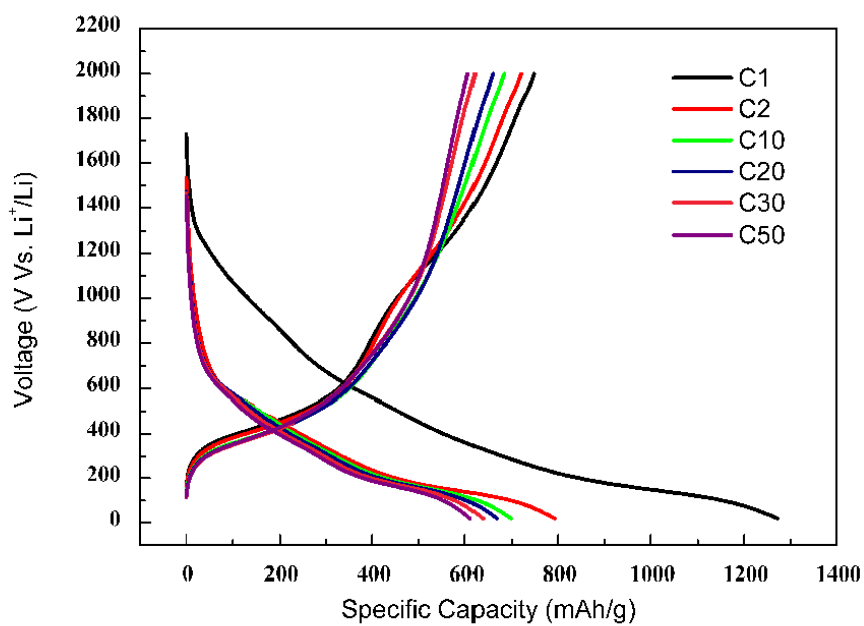

Fig. S6 Discharge-charge curves of only Ge electrode between 0 and 2V under a current density of 0.2C.

Table S1 Comparison of cycling performance with previous reports on Ge-based electrodes.

| Ref. | Year | Structure               | Fabrication method                | Cycling performance |         |                            |
|------|------|-------------------------|-----------------------------------|---------------------|---------|----------------------------|
|      |      |                         |                                   | rate                | cycle   | reversible capacity(mAh/g) |
|      | 2013 | 3DOM                    | Ionic liquid electrodeposition    | 0.2                 | 50      | 844                        |
| 1    | 2012 | Ge@C/RGO                | Capped with oleylamine            | 0.031C              | 50      | 940                        |
|      |      | Ge@C                    |                                   |                     |         | 490                        |
| 2    | 2008 | n-C/Ge                  | Solid-state pyrolysis             | 0.093C              | 50      | From 1190 to 923           |
| 3    | 2013 | Ge-NP slurry cast       | 40:20:40 =Ge NP : binder :Super-P | 1C in EC:DMC        | 10 -200 | from 1083 to 552           |
| 4    | 2011 | Ge NW                   | Solid-liquid solution method      | 0.5C                | 100     | 963 to 400                 |
| 5    | 2008 | Ge NW                   | VLS growth                        | 0.05C               | 20      | 1141                       |
| 6    | 2013 | Ge NW/ Graphite NF      | LPCVD (Ge/G-30)                   | 0.1C                | 30      | remain 800                 |
| 7    | 2013 | Ge NW                   | Sn Catalyzed Ge NWs               | 0.4C                | 50      | Sn/Ge 1000                 |
| 8    | 2013 | Graphene / GeNW         | Ge NW VLS Graphene CVD            | 4C                  | 200     | 1059                       |
| 9    | 2011 | Ge Nanotube             | Kirkendall effect                 | 40C                 | 400     | >1000                      |
| 10   | 2012 | As-deposited Ge         | 200-240nm thick                   | 0.14C               | 25      | 325                        |
|      |      | Ge nano structured film | Ion beam modified                 | 0.14C               | 25      | From 1352 to 1260          |
| 11   | 2004 | Nanocrystline filme     | PVD 236 µg                        | 0.25C               | 50      | 1400 to 840                |
|      |      | Amorphous film          | PVD(60-250nm) 0.042 µg            |                     | 60      | 1700                       |
| 12   | 2010 | Ge film -40%SWCN        | Electron beam evaporation         | 0.046C              | 10      | 825 to 700                 |
| 13   | 2007 | NP-Ge in Carbon matrix  | Na naphthalide reduction          | 0.2C                | 30      | 729                        |
| 14   | 2010 | Mesoporous Ge           | GeO+Mg etching                    | 0.93C               | 20      | 950 to 789                 |
| 15   | 2013 | Ge-based 3D electrode   | rf-sputtering                     | 1C                  | 50      | 1272                       |
| 16   | 2013 | Ge-CNT-Cu foam          | GeO <sub>2</sub> reduction        | 0.93C               | 100     | 800                        |
| 17   | 2013 | Ge/graphene             | thermal evaporation               | 0.625C              | 5       | about 880                  |
| 18   | 2012 | 3DOM Ge dense wall      | CVD                               | 0.2C                | 100     | 1027                       |
|      |      | 3DOM Ge porous wall     |                                   |                     |         | 1155                       |

1. D. J. Xue, S. Xin, Y. Yan, K. C. Jiang, Y. X. Yin, Y. G. Guo and L. J. Wan, *J Am Chem Soc*, 2012, **134**, 2512-2515.
2. G. L. Cui, L. Gu, L. J. Zhi, N. Kaskhedikar, P. A. van Aken, K. Mullen and J. Maier, *Adv Mater*, 2008, **20**, 3079-3083.
3. K. C. Klavetter, S. M. Wood, Y. M. Lin, J. L. Snider, N. C. Davy, A. M. Chockla, D. K. Romanovicz, B. A. Korgel, J. W. Lee, A. Heller and C. B. Mullins, *J Power Sources*, 2013, **238**, 123-136.
4. M. H. Seo, M. Park, K. T. Lee, K. Kim, J. Kim and J. Cho, *Energ Environ Sci*, 2011, **4**, 425-428.
5. C. K. Chan, X. F. Zhang and Y. Cui, *Nano Lett*, 2008, **8**, 307-309.
6. S. H. Woo, S. J. Choi, J. H. Park, W. S. Yoon, S. W. Hwang and D. Whang, *J Electrochem Soc*, 2013, **160**, A112-A116.
7. E. Mullane, T. Kennedy, H. Geaney, C. Dickinson and K. M. Ryan, *Chem Mater*, 2013, **25**, 1816-1822.
8. H. Kim, Y. Son, C. Park, J. Cho and H. C. Choi, *Angew Chem Int Edit*, 2013, **52**, 5997-6001.
9. M. H. Park, Y. Cho, K. Kim, J. Kim, M. L. Liu and J. Cho, *Angew Chem Int Edit*, 2011, **50**, 9647-9650.
10. N. G. Rudawski, B. L. Darby, B. R. Yates, K. S. Jones, R. G. Elliman and A. A. Volinsky, *Appl Phys Lett*, 2012, **100**.
11. J. Graetz, C. C. Ahn, R. Yazami and B. Fultz, *J Electrochem Soc*, 2004, **151**, A698-A702.
12. R. A. DiLeo, M. J. Ganter, R. P. Raffaele and B. J. Landi, *J Mater Res*, 2010, **25**, 1441-1446.
13. H. Lee, H. Kim, S. G. Doo and J. Cho, *J Electrochem Soc*, 2007, **154**, A343-A346.
14. L. C. Yang, Q. S. Gao, L. Li, Y. Tang and Y. P. Wu, *Electrochem Commun*, 2010, **12**, 418-421.
15. J. Z. Wang, N. Du, Z. Q. Song, H. Wu, H. Zhang and D. R. Yang, *Rsc Adv*, 2013, **3**, 7543-7548.
16. C. J. Zhang, S. P. Pang, Q. S. Kong, Z. H. Liu, H. Hu, W. Jiang, P. X. Han, D. Wang and G. L. Cui, *Rsc Adv*, 2013, **3**, 1336-1340.
17. J. G. Ren, Q. H. Wu, H. Tang, G. Hong, W. J. Zhang and S. T. Lee, *J Mater Chem A*, 2013, **1**, 1821-1826.
18. T. Song, Y. Jeon, M. Samal, H. Han, H. Park, J. Ha, D. K. Yi, J. M. Choi, H. Chang, Y. M. Choi and U. Paik, *Energ Environ Sci*, 2012, **5**, 9028-9033.
